# Supplementary material for: Optimizing the dynamic and thermodynamic properties of hybridization in DNA-mediated nanoparticle self-assembly
Source: Royal Society of Chemistry journal article supplement (doi:10.1039/d1cp01343b), 2021-01-01
Supplement: d1cp01343b1.pdf [file d1cp01343b1.pdf]

## Supplementary Information

### Optimizing the dynamic and thermodynamic properties of hybridization in DNA-mediated nanoparticle self-assembly

Qiuyan Yu, Dongjian Shi, Weifu Dong, Mingqing Chen\*

The Key Laboratory of Synthetic and Biological Colloids, Ministry of Education, School of Chemical and Material Engineering, Jiangnan University, Wuxi, Jiangsu 214122, China

To whom correspondence should be addressed.

E-mail: mqchen@jiangnan.edu.cn

#### Calculation method of related physical quantities

##### 1. Distance between two paired sticky beads

As strand-to-strand separation of DNA duplex is about  $\sigma$  (**Fig. S1**), the distance of about  $\sigma$  between two sticky beads is reasonable for forming a hydrogen bond. Therefore, DNA hybridization or duplex formation herein is defined if a sticky bead of a DNA strand is within the distance of  $\sigma$  away from its complementary sticky bead, namely, forming a hydrogen bond.

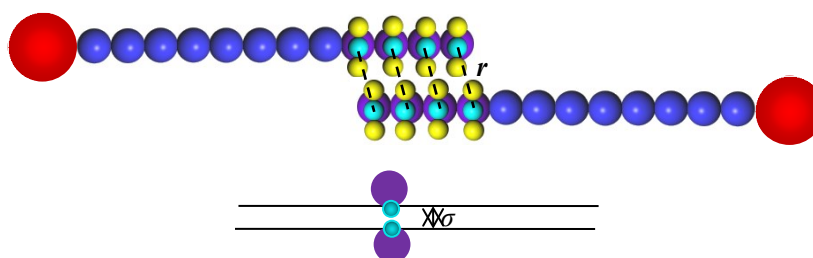

**Fig. S1** Example of hybridization between two DNA-NPs by linker-linker pairing interaction. The distance between two paired sticky beads  $r = \sigma$ .

## 2. Determine BCC lattice by structure factor

The structure factor is defined as  $S(\vec{q}) = \frac{1}{N} \left\langle \sum_{jk} e^{-i\vec{q} \cdot \vec{r}_j - \vec{r}_k} \right\rangle$ , where  $\vec{q}$  is the wave vector,  $N$  is the number of nanoparticles,  $\vec{r}_j, \vec{r}_k$  ( $j, k = 1, 2, 3, \dots, N$ ) are the positions of NPs.<sup>1, 2</sup> For BCC, the peaks  $q_1, q_2, q_3, q_4, q_5, q_6, q_7, q_8$  is equal to  $\sqrt{2}, \sqrt{4}, \sqrt{6}, \sqrt{8}, \sqrt{10}, \sqrt{12}, \sqrt{14}, \sqrt{16}$  corresponding to crystallographic planes (101), (200), (211), (220), (301), (222), (321), (400) (**Fig. S2**). Our simulation result agrees well with the theoretical peaks.

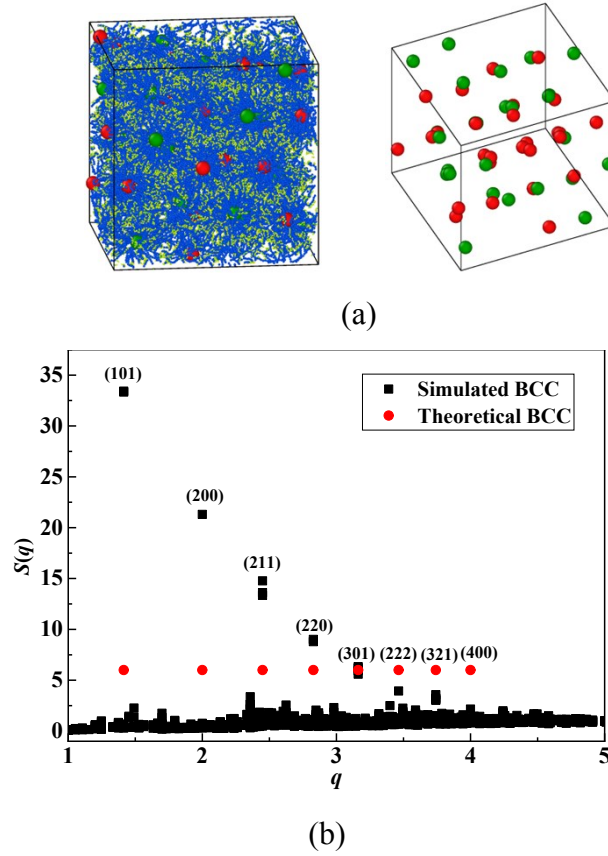

**Fig. S2** (a) BCC lattice snapshot (left: all DNA-NP beads, right: only nanoparticle beads) obtained from MD simulation under the conditions  $n_1 = 3, n_s = 8, n = 50, D = 10$  at  $T = 1.4$ . (b) Structure factor is used to determine the lattice structure.

## 3. Average distance between hybrid nearest neighbor A and B nanoparticles $r_0$

The nearest neighbor distance  $r_0$  between hybrid nearest-neighbor A and B nanoparticles present an increasing trend due to increasing nanoparticle size  $D$  (**Fig. S3a**).  $r_0$  can be identified by the first sharp peak position of pair radial distribution function  $g(r)$  (**Fig. S3b**), giving the probability

of finding a particle (or molecule) at distance  $r$  away from a reference particle, relative to that for the ideal gas distribution.<sup>3</sup> Although,  $g(r)$  can be measured for separations no greater than one half the edge length of the simulation cell ( $L = L_x = L_y = L_z$ ), the first peak position  $r_0$  ( $r_0 < L/2$ ) is indeed reliable. More importantly, the number integral over  $g(r)$  for the first peak square corresponds to coordination number ( $N_{\text{coord}} = 2 \int_0^{r_0} 4\pi r^2 \rho_0 g(r) dr$ ,  $\rho_0$  is the average number density) of nanoparticles, saying the average number of hybrid nearest-neighbor A and B nanoparticles.<sup>4, 5</sup> **Fig. S3c** shows coordination number presents a downward trend with increasing nanoparticle size  $D$ .

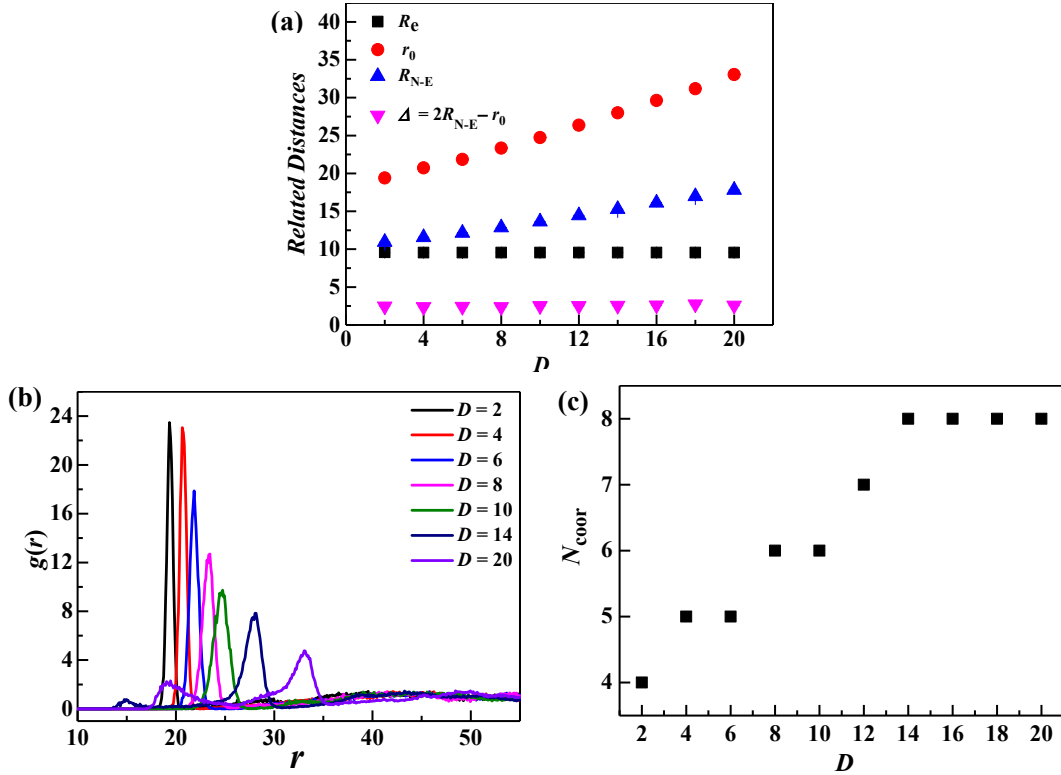

**Fig. S3** (a) Related distances containing  $R_e$ ,  $r_0$ ,  $R_{N-E}$  and  $\Delta$  as a function of nanoparticle size  $D$  in DNA-NP systems with  $D = 2 \sim 20$ ,  $n = 60$ ,  $n_l = 3$  and  $n_s = 8$  at  $T = 1.3$ . Here  $R_e$ ,  $r_0$ ,  $R_{N-E}$  represent the root mean square end-to-end distance of DNA chains, average distance between hybrid nearest-neighbor A and B nanoparticles, average distance between nanoparticles and the end of DNA chains, respectively.  $\Delta = 2R_{N-E} - r_0$ , representing contact distance parameter of sticky linker beads. (b) Radical distribution functions  $g(r)$  of nanoparticles. (c) Coordination number ( $N_{\text{coord}} = 2 \int_0^{r_0} 4\pi r^2 \rho_0 g(r) dr$ ,  $\rho_0$  is the average number density) of nanoparticles, namely, the average number of hybrid nearest-neighbor A and B nanoparticles.

#### 4. Effective volume fraction $\phi$

If every DNA-NP molecule is regarded as a sphere, the volume fraction of all DNA-NP spheres is calculated by  $\phi_0 = \frac{4\pi NR_{N-E}^3}{3L^3}$  where  $R_{N-E}$  is the average distance between nanoparticle and the end of DNA chains,  $N$  ( $= 54$ ) is the number of nanoparticles in our simulation system,  $L$  is the length of simulation box length. Thus, the volume  $V_h$  of hybrid shadow part is double-counted and should be subtracted (**Fig. S4a**).

The shadow part volume  $V_h = 2\pi H^2(R - H/3)$ , where  $R$  is the radius of the sphere,  $H$  is the height of the spherical cap in **Fig. S4b**. Here  $R = R_{N-E}$ ,  $H = \Delta/2 = R_{N-E} - r_0/2$ , then

$V_h = \frac{4}{3}\pi R_{N-E}^3 - \pi R_{N-E}^2 r_0 + \frac{\pi}{12} r_0^3$ . There is not only one nanoparticle to bond with every nanoparticle by DNA interaction in the DNA-NP systems. We estimate volume fraction of all hybrid parts

$f_h = N_{\text{coor}} V_s / (\frac{4}{3}\pi R_{N-E}^3)$ , then  $f_h = [1 - \frac{3}{4} \frac{r_0}{R_{N-E}} + \frac{1}{16} (\frac{r_0}{R_{N-E}})^3] N_{\text{coor}}$  where  $N_{\text{coor}}$  is the number of nearest neighbor nanoparticles, saying the number of hybrid parts. Therefore, The real effective volume

fraction  $\phi = \frac{4\pi NR_{N-E}^3}{3L^3} (1 - f_h)$ .

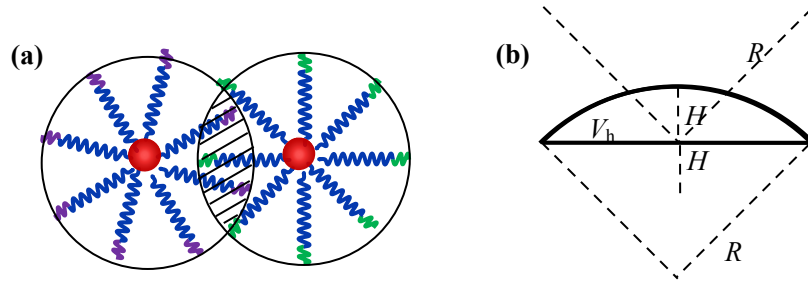

**Fig. S4** (a) Schematic illustration of hybridization between two DNA-NPs by linker-linker pairing interaction for binary self-assembly system. (b) Sketch drawing of the shadow part.

## 5. Free energy calculated by nearest-neighbor rule

Herein, we take the base sequences 5'TAAT TAAT TAAT-3'/3'-ATTA ATTA ATTA-5' as an example to calculate the free energy by using the nearest-neighbor rule<sup>6, 7</sup>:

$$\Delta G_{37}^{\circ}(\text{total}) = \Delta G_{37}^{\circ} \text{ initiation} + \Delta G_{37}^{\circ} \text{ symmetry} + \Sigma \Delta G_{37}^{\circ} \text{ stack} + \Delta G_{\text{AT terminal}}^{\circ}$$

$$5'\text{-TAAT TAAT TAAT-3'} = \Delta G_{37}^{\circ} \text{ initiation} + \Delta G_{37}^{\circ} \text{ symmetry} + 2(\text{TA} + \text{AA} + \text{AT} + \text{TT}) + \text{TA} + \text{AA} + \text{AT} + \text{AT}_{\text{terminal}}$$

$$3'\text{-ATTA ATTA ATTA-5'} \quad \text{AT} \quad \text{TT} \quad \text{TA} \quad \text{AA} \quad \text{AT} \quad \text{TT} \quad \text{TA}$$

$$\Delta G_{37}^{\circ}(\text{predicted}) = 1.96 + 0 + 2 \times (-0.58 - 1.00 - 0.88 - 1.00) - 0.58 - 1.00 - 0.88 + 0.05$$

$$= -7.37 \text{ kcal/mol} = -30.84 \text{ kJ/mol}$$

**Table S1.** Nearest-neighbor thermodynamic parameters for DNA Watson-Crick pairs in 1 M NaCl<sup>7</sup>

| Propagation sequence | $\Delta H^{\circ}$<br>(kcal mol <sup>-1</sup> ) | $\Delta S^{\circ}$<br>(e.u.) | $\Delta G^{\circ}$<br>(kcal mol <sup>-1</sup> ) |
|----------------------|-------------------------------------------------|------------------------------|-------------------------------------------------|
| AA/TT                | -7.6                                            | -21.3                        | -1.00                                           |
| AT/TA                | -7.2                                            | -20.4                        | -0.88                                           |
| TA/AT                | -7.2                                            | -21.3                        | -0.58                                           |
| CA/GT                | -8.5                                            | -22.7                        | -1.45                                           |
| GT/CA                | -8.4                                            | -22.4                        | -1.44                                           |
| CT/GA                | -7.8                                            | -21.0                        | -1.28                                           |
| GA/CT                | -8.2                                            | -22.2                        | -1.30                                           |
| CG/GC                | -10.6                                           | -27.2                        | -2.17                                           |
| GC/CG                | -9.8                                            | -24.4                        | -2.24                                           |
| GG/CC                | -8.0                                            | -19.9                        | -1.84                                           |
| Initiation           | +0.2                                            | -5.7                         | +1.96                                           |
| Terminal AT penalty  | +2.2                                            | +6.9                         | +0.05                                           |
| Symmetry correction  | 0.0                                             | -1.4                         | +0.43                                           |

The slash indicates the sequences are given in antiparallel orientation. (e.g., AC/TG means 5'-AC-3' is Watson-Crick base paired with 3'-TG-5'). The symmetry correction applies to only self-complementary duplexes. The terminal AT penalty is applied for each end of a duplex that has a terminal AT (a duplex with both end closed by AT pairs would have a penalty of +0.1 kcal/mol for  $\Delta G_{37}^{\circ}$ ). 1 kcal/mol = 4.184 kJ/mol.

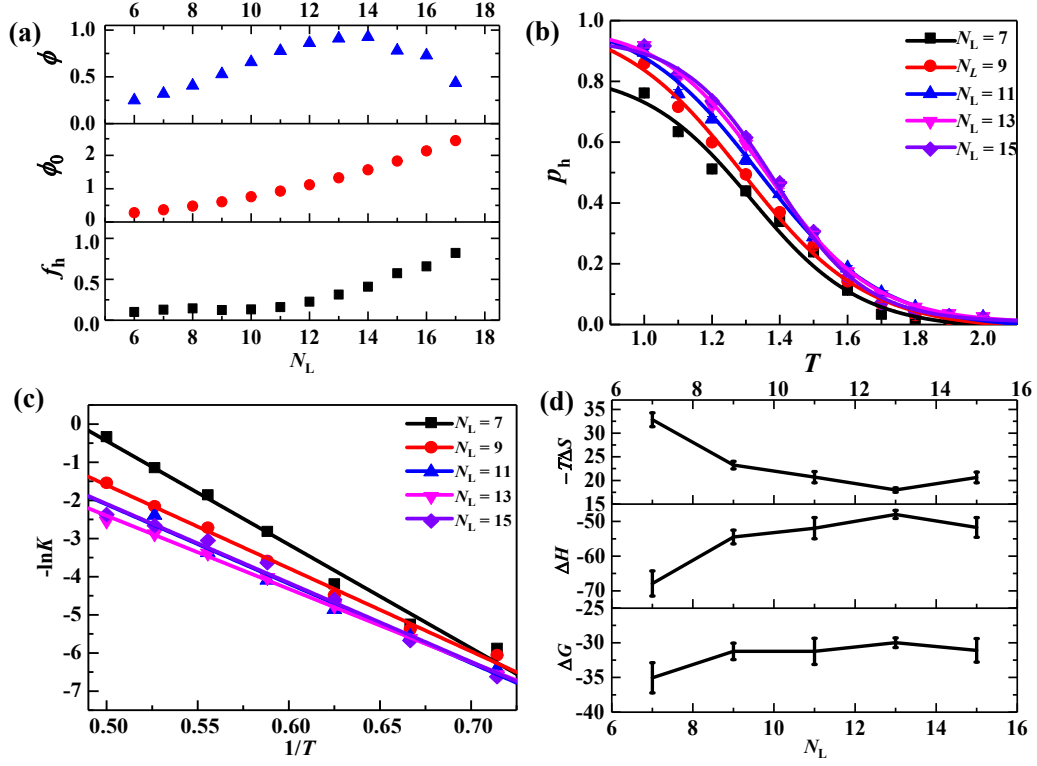

**Fig. S5** Hybridization properties for DNA-NP systems with DNA chain length  $N_L = 6 \sim 17$ ,  $n_l = 3$ ,  $D = 10$ ,  $n = 60$ . (a) The three panels represent the volume fraction of all hybrid parts  $f_h$ , volume fraction of all DNA-NP spheres  $\phi_0$  and real effective volume fraction  $\phi = \phi_0(1-f_h)$  at  $T = 1.3$ , respectively. (b)  $p_h$  as a function of  $T$ . (c)  $-\ln K$  as a function of  $1/T$ : the solid lines are least-square fits to the data points from simulation. (d)  $\Delta G$ ,  $\Delta H$  and  $-T\Delta S$  in unit of kJ/mol of DNA hybridization as a function of  $N_L$  at room temperature.

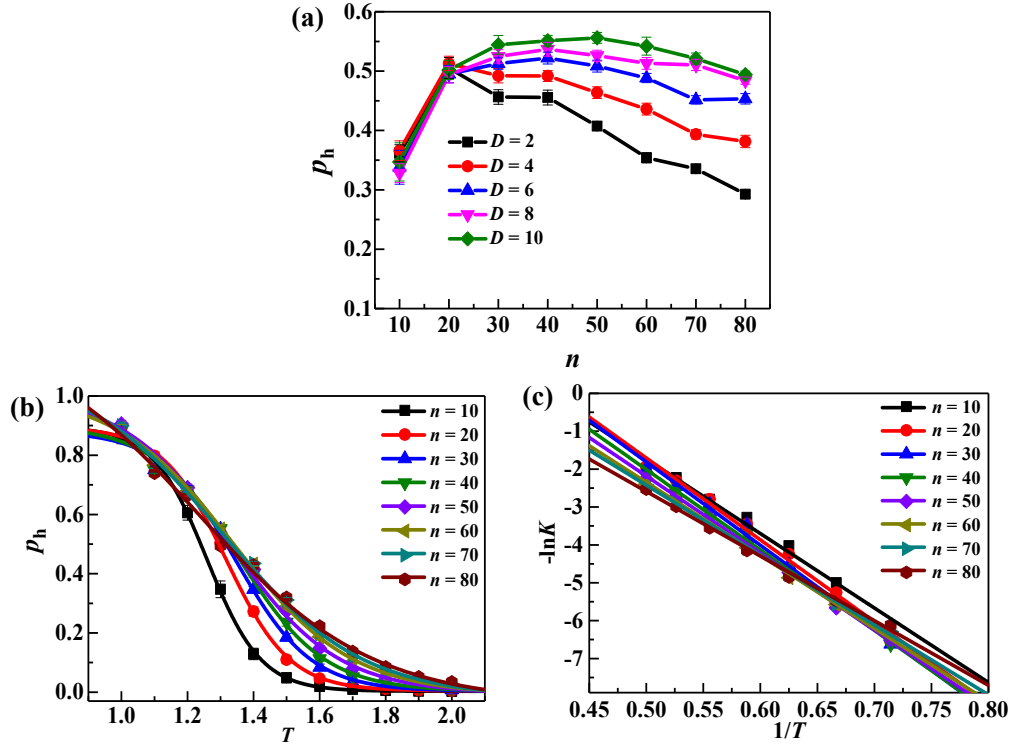

**Fig. S6** Hybridization properties for DNA-NP systems with different number of DNA chains ( $n = 10\sim 80$ ) grafted on one nanoparticle,  $D = 2\sim 10$ ,  $n_l = 3$  and  $n_s = 8$ . (a)  $p_h$  as a function of chain number  $n$  for DNA-NP systems with  $D = 2\sim 10$ . (b)  $p_h$  as a function of  $T$  for  $n = 10\sim 80$ ,  $D = 10$ . (c)  $-\ln K$  as a function of  $1/T$ : the solid lines are least-square fits to the data points from simulation.

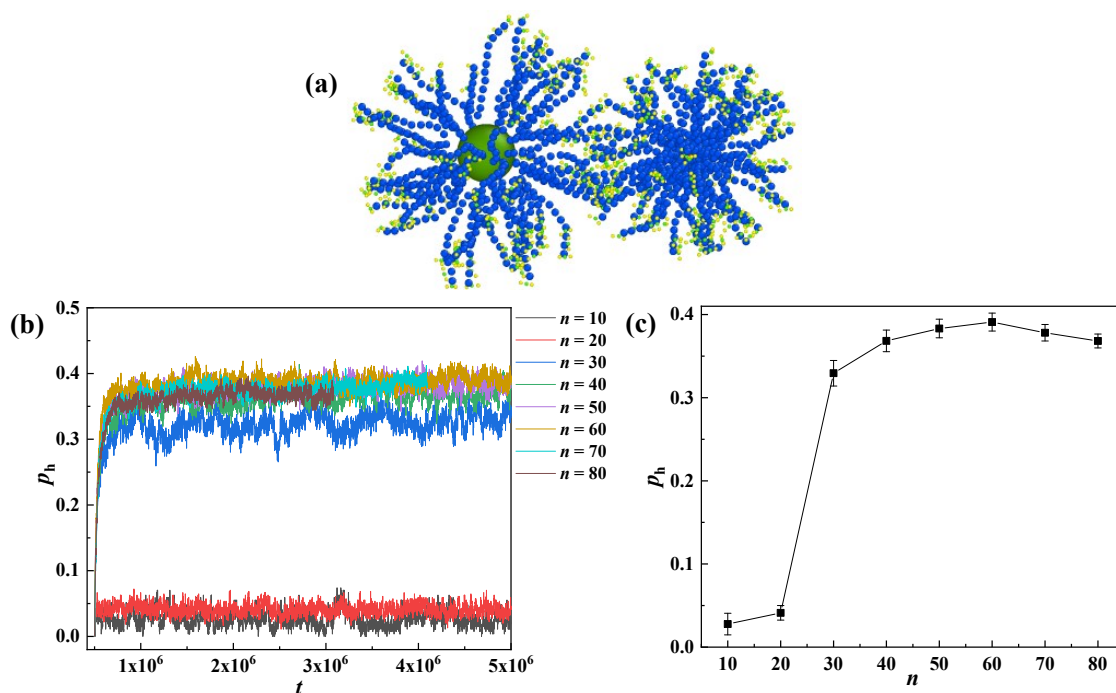

**Fig. S7** (a) Hybridization example of two DNA-NPs with different nanoparticle sizes. (b) Hybridization percentage  $p_h$  as a function of simulation step time  $t$  for DNA-NP systems with different chain number  $n = 10 \sim 80$ ,  $n_l = 3$  and  $n_s = 8$  at  $T = 1.3$ . (c) Average hybridization percentage  $p_h$  as a function of  $n$ .

## References

- 1 Q. Yu, X. Zhang, Y. Hu, Z. Zhang and R. Wang, *ACS Nano*, 2016, **10**, 7485-7492.
- 2 Q. Yu and R. Wang, *Macromolecules*, 2018, **51**, 8372-8376.
- 3 A. R. Leach, *Molecular modelling: principles and applications*, London, Pearson Education Limited, 2001.
- 4 T. I. N. G. Li, R. Sknepnek, R. J. Macfarlane, C. A. Mirkin and M. O. de la Cruz, *Nano Lett.*, 2012, **12**, 2509-2514.
- 5 T. I. N. G. Li, R. Sknepnek and M. O. de la Cruz, *J. Am. Chem. Soc.*, 2013, **135**, 8535-8541.
- 6 K. J. Breslau, R. Frank, H. Blocker and L. A. Marky, *Proc. Natl. Acad. Sci. USA*, 1986, **83**, 3746-3750.
- 7 J. Santalucia and D. Hicks, *Annu. Rev. Biophys. Biomol. Struct.*, 2004, **33**, 415-440.
